# Supplementary material for: Facile and Eco-Friendly Synthesis of Finger-Like Co3O4 Nanorods for Electrochemical Energy Storage
Source: MDPI journal article supplement (doi:10.3390/nano5042335), 2015-12-17
Supplement: s1 [file s1]

## Supplementary Information

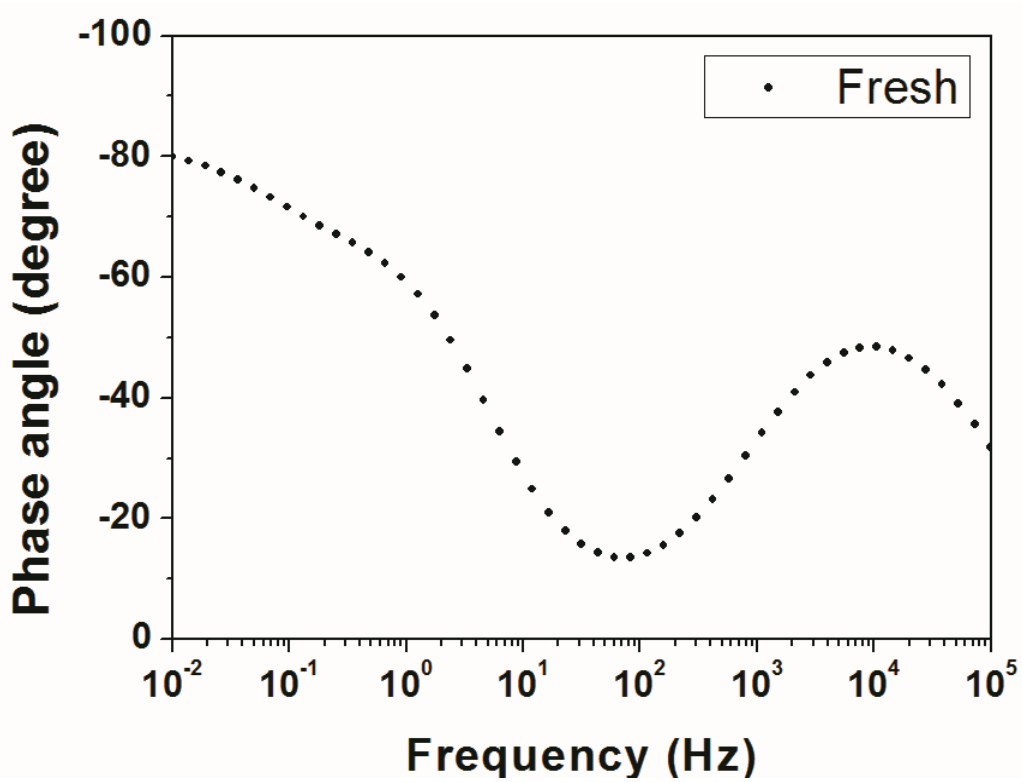

**Figure S1.** Bode plot of the fresh Co<sub>3</sub>O<sub>4</sub> nanorod electrode.

© 2015 by the authors; licensee MDPI, Basel, Switzerland. This article is an open access article distributed under the terms and conditions of the Creative Commons Attribution license (<http://creativecommons.org/licenses/by/4.0/>).
